# Supplementary material
Source: PubMed Central journal article supplement (PMC7964265)
Supplement: 15-00131.pdf [file 15-00131.pdf]

**On-line Table: Formulas and description of GLCM texture parameters**

| Texture Parameter                       | Formula <sup>a</sup>                                                                   | Description                                                                                                                                                                                    |
|-----------------------------------------|----------------------------------------------------------------------------------------|------------------------------------------------------------------------------------------------------------------------------------------------------------------------------------------------|
| Contrast                                | $\sum_{n=0}^{N_g-1} (i-j)^2 \left\{ \sum_{i=1}^{N_g} \sum_{j=1}^{N_g} p(i,j) \right\}$ | Represents the amount of local gray level variation in an image; a high value of this parameter may indicate the presence of edges, noise, or wrinkled textures in the image                   |
| Homogeneity (inverse difference moment) | $\sum_{i=1}^{N_g} \sum_{j=1}^{N_g} \frac{p(i,j)}{1+(i-j)^2}$                           | Measures the smoothness (homogeneity) of the gray level distribution of the image; it is (approximately) inversely correlated with contrast—if contrast is small, usually homogeneity is large |
| Correlation                             | $\sum_{i=1}^{N_g} \sum_{j=1}^{N_g} \frac{ijp(i,j) - \mu_x\mu_y}{\sigma_x\sigma_y}$     | Measures the linear dependency of gray levels on those of neighboring pixels; it provides a measure similar to autocorrelation methods                                                         |
| Variance (sum of squares)               | $\sum_{i=1}^{N_g} \sum_{j=1}^{N_g} (i-\mu)^2 p(i,j)$                                   | Measures the dispersion (with regard to the mean) of the gray level distribution                                                                                                               |
| Sum average <sup>b</sup>                | $\sum_{i=2}^{2N_g} ip_{x+y}(i)$                                                        | Measures the mean of the gray level sum distribution of the image                                                                                                                              |
| Sum variance <sup>b</sup>               | $\sum_{i=2}^{2N_g} \left( i - \left[ \sum_{i=2}^{2N_g} ip_{x+y}(i) \right] \right)^2$  | Measures the dispersion (with regard to the mean) of the gray level sum distribution of the image                                                                                              |
| Difference variance <sup>c</sup>        | $\sum_{i=2}^{2N_g} \left( i - \left[ \sum_{i=2}^{2N_g} ip_{x-y}(i) \right] \right)^2$  | Measures the dispersion (with regard to the mean) of the gray level difference distribution of the image                                                                                       |
| Uniformity (angular second moment)      | $\sum_{i=1}^{N_g} \sum_{j=1}^{N_g} p(i,j)^2$                                           | Measures the uniformity (or orderliness) of the gray level distribution of the image; images with a smaller number of gray levels have larger uniformity                                       |
| Entropy                                 | $-\sum_{i=1}^{N_g} \sum_{j=1}^{N_g} p(i,j) \log[p(i,j)]$                               | Measures the degree of disorder among pixels in the image; it is (approximately) inversely correlated with uniformity; images with a larger number of gray levels have larger entropy          |
| Sum entropy <sup>b</sup>                | $-\sum_{i=2}^{2N_g} p_{x+y}(i) \log\{p_{x+y}(i)\}$                                     | Measures the disorder related to the gray level-sum distribution of the image                                                                                                                  |
| Difference entropy <sup>c</sup>         | $-\sum_{i=0}^{N_g-1} p_{x-y}(i) \log\{p_{x-y}(i)\}$                                    | Measures the disorder related to the gray level difference distribution of the image                                                                                                           |

<sup>a</sup> In all equations,  $p(i, j)$  is the  $(i, j)$ -th entry of the normalized GLCM, that is,  $p(i, j) = P(i, j) / \sum_{ij} P(i, j)$ , where  $P(i, j)$  is the  $(i, j)$ -th entry of the computed GLCM;  $N_g$  is the total number of gray levels in the image; and  $\mu_x, \mu_y$  and  $\sigma_x, \sigma_y$  denote the mean and SDs of the row and column sums of the GLCM, respectively.

<sup>b</sup> The gray level sum distribution is given by  $p_{x+y}(k) = \sum_{i+j=k} p(i, j)$ ,  $k = 2, 3, \dots, 2N_g$ ; it is related to the distribution of the sum of co-occurring pixels in the image.

<sup>c</sup> The gray level difference distribution is given by  $p_{x-y}(k) = \sum_{|i-j|=k} p(i, j)$ ,  $k = 0, 1, 2, \dots, N_g - 1$ ; it is related to the distribution of the difference between co-occurring pixels in the image.
